# Supplementary material
Source: PubMed Central journal article supplement (PMC3700126)
Supplement: MCB.00220-13_zmb999100030so1.pdf [file MCB.00220-13_zmb999100030so1.pdf]

## SUPPLEMENTAL FIGURE

**Figure S1.** Immunoprecipitation using antibody against 5-methylcytosine for DNA with various densities of CpG methylation. Two different concentrations of the antibody, 3 ng/ul (■) and 6 ng/ul (◆), were used in IP of 25 ul with 100 ng of target DNA. The DNA pull-down by the antibody is quantitated with q-PCR using a TaqMan probe for various regions of the DNA and using purified plasmid DNA of known quantities for a standard curve in the same qPCR experiment.

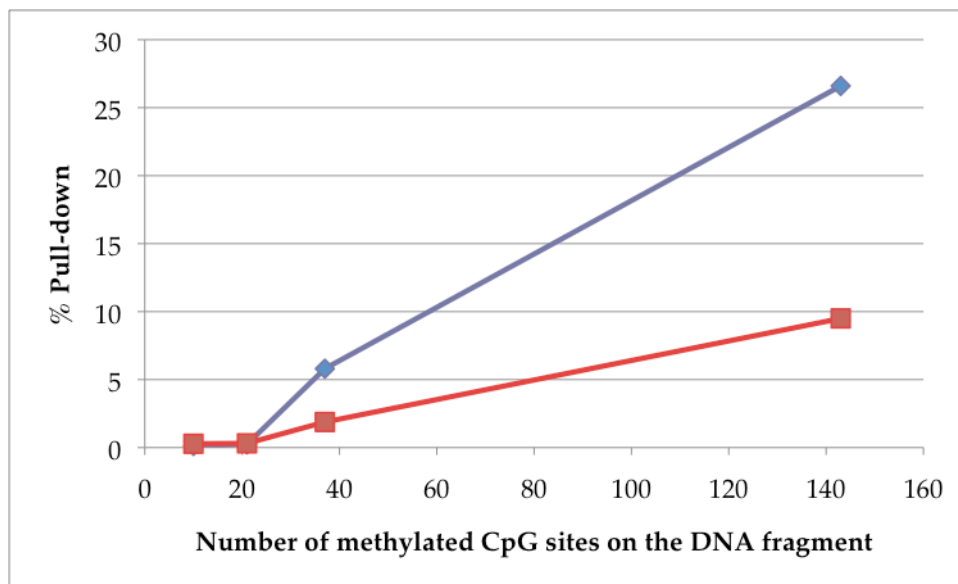

**Supplemental Table 1 Three regions of mtDNA from HEK293 cells analyzed.**

| Region amplified | # of molecule sequenced | # of CpG sites | # of PCR reactions | Total # of CpG sites examined | # of methylated CpG detected | methylation frequency |
|------------------|-------------------------|----------------|--------------------|-------------------------------|------------------------------|-----------------------|
| 16381 - 70       | 66                      | 8              | 4                  | 528                           | 0                            | <0.19%                |
| 560 - 893        | 69                      | 7              | 4                  | 483                           | 0                            | <0.20%                |
| 4250- 4569       | 68                      | 7              | 4                  | 476                           | 0                            | <0.21%                |

Region amplified is based on the nucleotide position of the human mtDNA map

at [www.mitomap.org](http://www.mitomap.org).
